# Supplementary material for: Mapping the current evidence on the anesthetic management of adult patients with neuromuscular disorders—a scoping review
Source: Springer Nature journal article supplement (doi:10.1007/s12630-022-02230-3), 2022-03-23
Supplement: MOESM1 [file 20247240]

**Appendix 1: Search strategy**

**Pubmed**

Category 1: Neuromuscular disease

"Neuromuscular Diseases"[Mesh:NoExp] OR "Mitochondrial Myopathies"[Mesh] OR "Myasthenia Gravis"[Mesh:NoExp] OR "Muscular Dystrophies"[Mesh] OR "Myotonic DisORders"[Mesh] OR "Myopathies, Structural, Congenital"[Mesh] OR "Rhabdomyolysis"[Mesh]OR "Amyotrophic Lateral Sclerosis"[Mesh] OR Eaton Lambert[tiab] OR Lambert Eaton[tiab] OR Muscle DisORder*[tiab] OR Muscular Disease*[tiab] OR Muscular Dystroph*[tiab] OR Myasthenia gravis[tiab] OR myasthenia like syndrome[tiab] OR Myopath*[tiab] OR Myoton*[tiab] OR Neuromuscular Disease*[tiab] OR King DenbORough syndrome[tiab] OR myodystroph*[tiab] OR Rhabdomyolysis[tiab] OR Amyotrophic Lateral Sclerosis [tiab] OR Central cORe disease[tiab] OR MultiminicORe[tiab] OR Duchenne[tiab] OR limb girdle*[tiab] OR steinert [tiab] OR Becker muscular*[tiab] OR Thomsen*[tiab] OR Ryanodine receptOR 1[tiab] OR RYR1 [tiab] OR neuromuscular dysfunction*[tiab] OR neuromuscular disORder*[tiab] OR neuromuscular syndrome*[tiab] OR neuromyopath*[tiab] OR Muscle Dystroph*[tiab]

**AND**

Category 2: Anaesthesia

“Anesthesia” [Mesh] OR “Anesthetics" [Mesh] OR Desflurane[MeSH] OR "Anesthesia and Analgesia"[Mesh] OR "Anesthetics" [Pharmacological Action] OR Halothane[MeSH] OR Isoflurane[MeSH] OR Propofol[MeSH] OR Sevoflurane[MeSH] OR Neuromuscular Blocking Agents [Pharmacological Action] OR Anesthe*[tiab] OR Anaesthe*[tiab] OR Halothane[tiab] OR Isoflurane[tiab] OR Propofol[tiab] OR Sevoflurane[tiab] OR Succinylcholine[tiab] OR Neuromuscular Block*[tiab]

**AND**

Category 3: Perioperative care

Postoperative Complications[MeSH:noexp] OR Malignant Hyperthermia[MeSH] OR Delayed Emergence from Anesthesia[MeSH] OR Intraoperative Complications[MeSH:noexp] OR Perioperative Care[MeSH] OR Preoperative care[MeSH] OR "Rhabdomyolysis"[Mesh] OR

Intraoperative[tiab] OR Intra-operative[tiab] OR Malignant Hyperthermia[tiab] OR Perioperative[tiab] OR Perioperative[tiab] OR Postoperative[tiab] OR Postoperative[tiab] OR Preoperative[tiab] OR Preoperative[tiab] OR Residual block*[tiab] OR Residual neuromuscular[tiab] OR Rhabdomyolysis[tiab]

Embase

Filter on publication date: 2000/01/01

Date search: 2021/07/14

**Embase**

Category 1: Neuromuscular disease

Neuromuscular Disease/ OR Mitochondrial Myopathy/ OR Myasthenia Gravis/ OR eaton lambert syndrome/ OR myasthenia like syndrome/ OR muscular dystrophy/ OR becker muscular dystrophy/ OR duchenne muscular dystrophy/ OR limb girdle muscular dystrophy/ OR myotonic dystrophy/ OR Myotonia/ OR Thomsen disease/ OR myopathy/ OR central cORe disease/ OR centronuclear myopathy/ OR multiminicORe disease/ OR amyotrophic lateral sclerosis/ OR ryanodine receptOR 1/ OR rhabdomyolysis/ OR (Eaton Lambert OR Lambert Eaton OR Muscle DisORder* OR Muscle Dystroph* OR Muscular Disease* OR Muscular Dystroph* OR Amyotrophic lateral sclerosis OR Central cORe disease OR multiminicORe* OR Thomsen* of Myasthenia gravis OR myasthenia like syndrome* OR myodystroph* OR Myopath* OR myoton* OR Neuromuscular Disease* OR neuromuscular disORder* OR neuromuscular dysfunction OR neuromuscular syndrome* OR neuromyopath* OR king denbORough syndrome OR Duchenne OR Becker muscular OR rhabdomyolysis* OR Ryanodine receptOR 1 OR RYR1* OR limb girdle* OR steinert).ti,ab,kw.

**AND**

Category 2: Anaesthesia

exp anesthesiological procedure/ OR exp anesthetic agent/ OR exp neuromuscular blocking agent/ OR exp neuromuscular depolarizing agent/ OR exp anesthesiological procedure/ OR exp anesthetic agent/ OR (Anesthesia OR anesthesiology OR Propofol OR Neuromuscular depolarizing agent* OR Neuromuscular block* OR Suxamethonium OR succinylcholine OR halothane OR sevoflurane OR isoflurane OR desflurane).ti,ab,kw.

**AND**

Category 3: Perioperative care

Postoperative Complication/ OR Anesthesia complication/ OR Malignant Hyperthermia/ OR "Delayed Emergence from Anesthesia"/ OR Peroperative Complication/ OR Peroperative Care/ OR Preoperative care/ OR preoperative complication/ OR postoperative care/ OR postanesthesia care/ OR Rhabdomyolysis/ OR (Intraoperative OR Intra-operative OR Malignant Hyperthermia OR Perioperative OR Peri-operative OR Peroperative OR Postoperative OR Post-operative OR postanesthesia OR post-anesthesia OR Preoperative OR Pre-operative OR Residual block* OR Residual neuromuscular OR Rhabdomyolysis).ti,ab,kw.

Embase

Filter on publication date: 2000/01/01

Date search: 2021/07/14
